# Supplementary material for: The genomic landscape of 85 advanced neuroendocrine neoplasms reveals subtype-heterogeneity and potential therapeutic targets
Source: PubMed Central journal article supplement (PMC8322054; doi:10.1038/s41467-021-24812-3), 2021-07-29
Supplement: 41467_2021_24812_MOESM3_ESM.pdf [file 41467_2021_24812_MOESM3_ESM.pdf]

Descriptions of Additional Supplementary Files

**Supplementary data 1**

**Description:** Overview of all data presented and quantified in this manuscript.
